# Supplementary material
Source: Frontiers journal article supplement (https://www.frontiersin.org/articles/124075)
Supplement: Table_2.PDF [file Table_2.PDF]

|                             |                     |                            |
|-----------------------------|---------------------|----------------------------|
| <b>ga</b> KE <b>na</b> sufo | <b>ga</b> puladeRO  | <b>ga</b> NAjifo <b>ke</b> |
| FO <b>ga</b> jinake         | Jl <b>ga</b> purola | su <b>GA</b> fokezi        |
| roPU <b>ga</b> jide         | dena <b>ga</b> FOsu | SUzi <b>ga</b> roke        |
| lakefo <b>ga</b> JI         | DEsun <b>ga</b> fo  | naroz <b>ig</b> aDE        |
| puroLAde <b>ga</b>          | fonakeSU <b>ga</b>  | rolaZIp <b>ga</b>          |

|                             |                     |                            |
|-----------------------------|---------------------|----------------------------|
| <b>lu</b> KE <b>na</b> sufo | <b>lu</b> puladeRO  | <b>lu</b> NAjifo <b>ke</b> |
| FO <b>lu</b> jinake         | Jl <b>lu</b> purola | su <b>LU</b> fokezi        |
| roPU <b>lu</b> jide         | dena <b>lu</b> FOsu | SUzi <b>lu</b> roke        |
| lakefo <b>lu</b> JI         | DEsun <b>lu</b> fo  | naroz <b>il</b> uDE        |
| puroLAde <b>lu</b>          | fonakeSU <b>lu</b>  | rolaZIp <b>lu</b>          |

|                             |                     |                            |
|-----------------------------|---------------------|----------------------------|
| <b>mi</b> KE <b>na</b> sufo | <b>mi</b> puladeRO  | <b>mi</b> NAjifo <b>ke</b> |
| FO <b>mi</b> jinake         | Jl <b>mi</b> purola | su <b>MI</b> fokezi        |
| roPU <b>mi</b> jide         | dena <b>mi</b> FOsu | SUzi <b>mi</b> roke        |
| lakefo <b>mi</b> JI         | DEsun <b>mi</b> fo  | naroz <b>imi</b> DE        |
| puroLAde <b>mi</b>          | fonakeSU <b>mi</b>  | rolaZIp <b>umi</b>         |

**Table 2.** Artificial language in the *Inconsistent pitch peak* condition. Bold syllables are the target labels, while the capitalized syllables are stressed in pitch.
